# Supplementary material for: A New Approach to Atopic Dermatitis Control with Low-Concentration Propolis-Loaded Cold Cream
Source: MDPI journal article supplement (doi:10.3390/pharmaceutics13091346), 2021-08-27
Supplement: s1 [file s1]

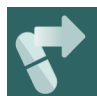

# Supplementary Materials: A New Approach to Atopic Dermatitis Control with Low-Concentration Propolis-Loaded Cold Cream

Bianca Aparecida Martin, Camila Nunes Lemos, Luciana Facco Dalmolin, Caroline Arruda, Íris Sperchi Camilo Brait, Maurilio de Souza Cazarim, Estael Luzia Coelho da Cruz-Cazarim, Paula Carolina Pires Bueno, Maurílio Polizello Júnior, Leonardo Régis Leira Pereira, Renata Nahas Cardili and Renata Fonseca Vianna Lopez

(a)

Methanol:Water Fraction

Raw Besswax

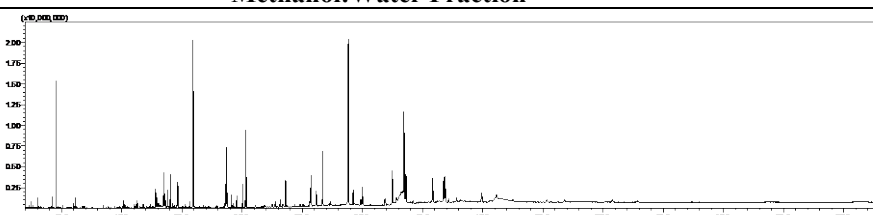

Purified Besswax

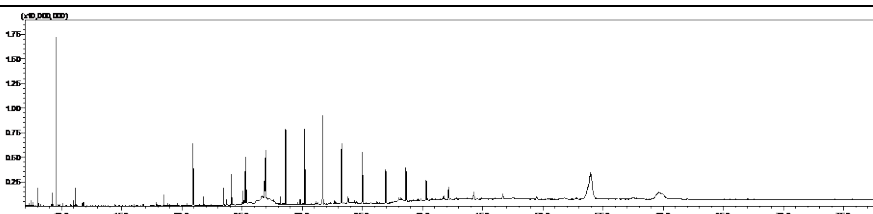

(b)

Hexane Fraction

Raw Besswax

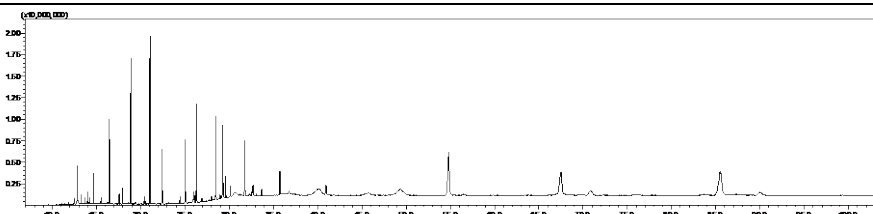

Purified Besswax

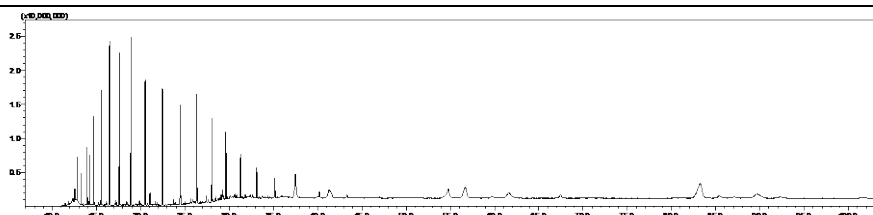

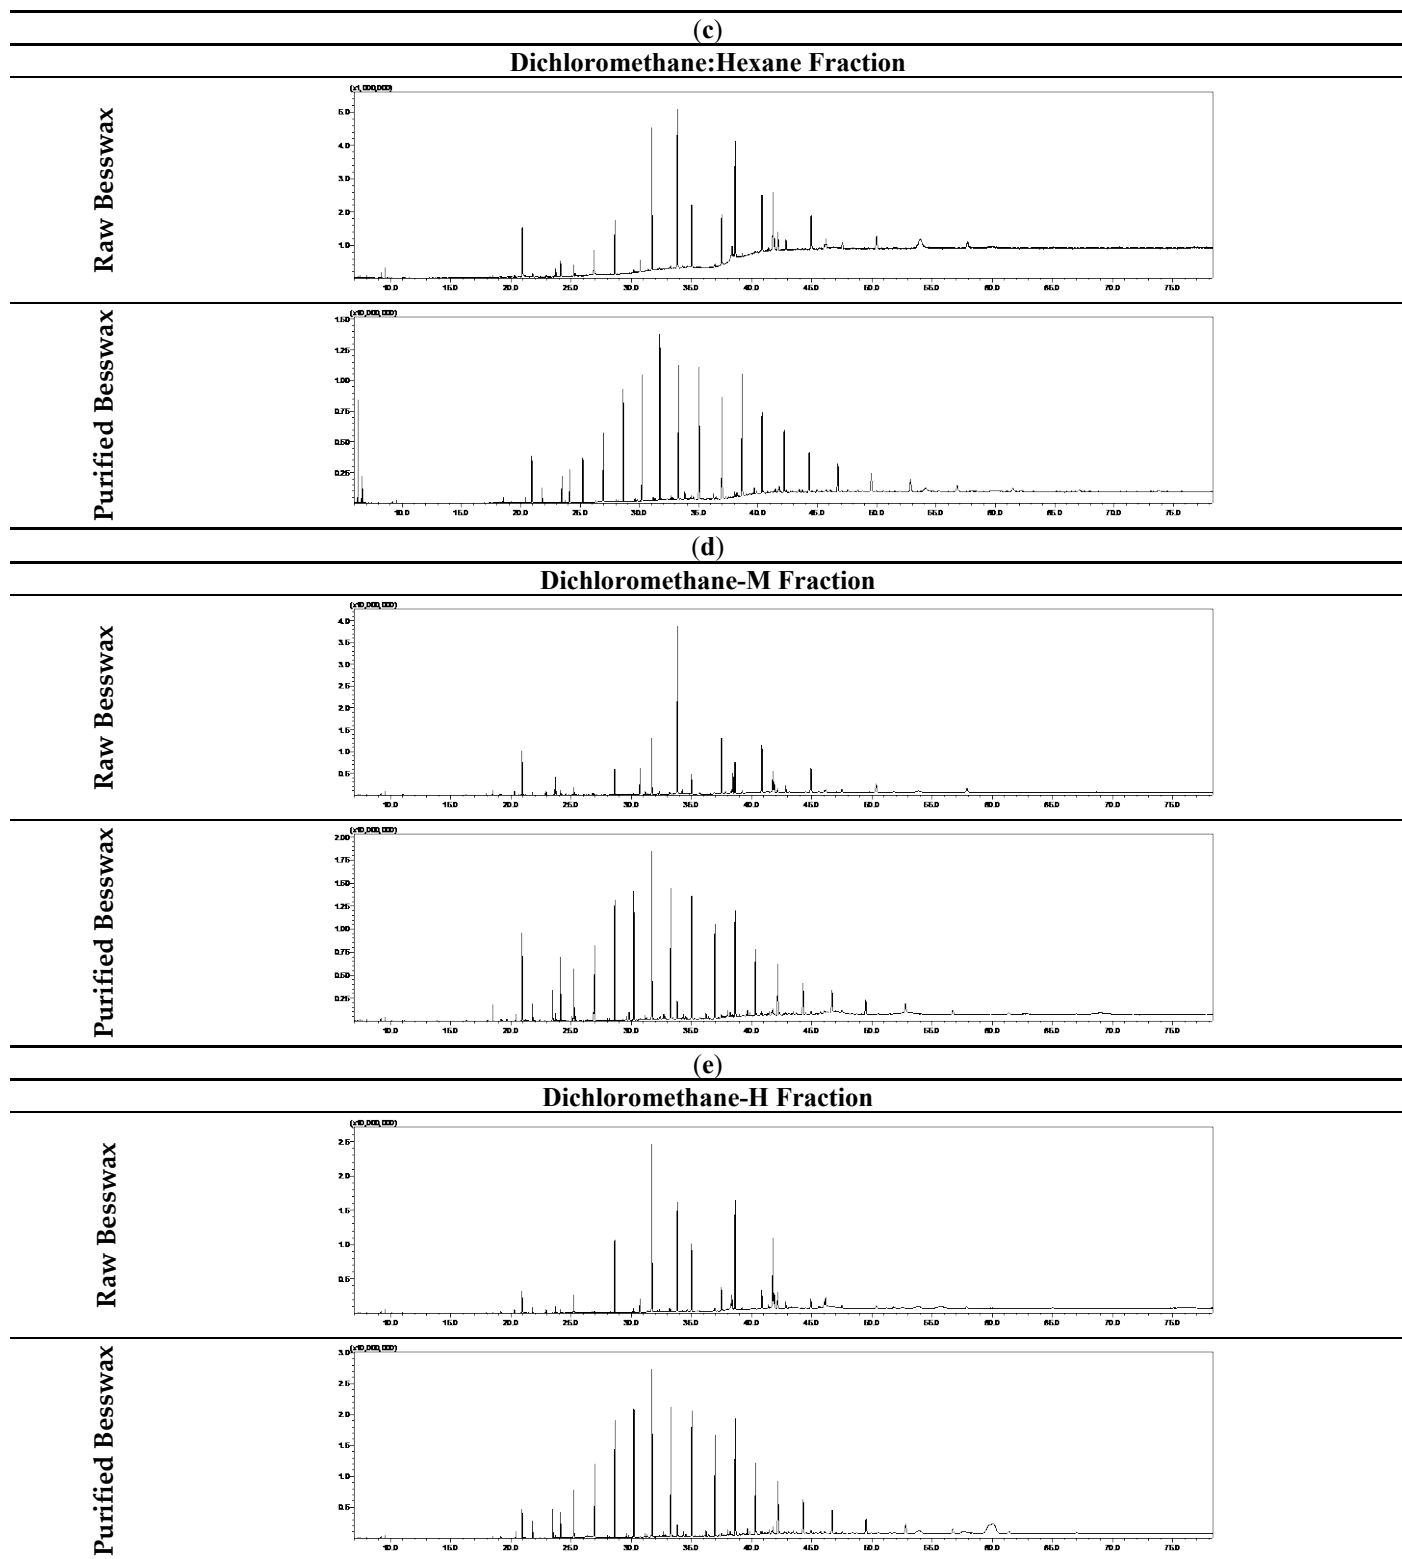

**Figure S1.** Chromatograms of samples of raw and purified beeswax in the different fractions studied, obtained by GC/MS. Chromatograms of fractions (a) methanol, (b) hexane, (c) dichloromethane:hexane, (d) CH<sub>2</sub>Cl<sub>2</sub>-MeOH and (e) CH<sub>2</sub>Cl<sub>2</sub>-Hex. Chromatographic conditions: Helium gas pressure of 187.1 kPa, linear viscosity 31.9 cm/s and column flow 1.5 mL/min. Ion source temperature 250°C and mass range 40 to 700 *m/z* every 0.3 s. Database: NIST11, NIST11-S, WILEY7, NIST08 and FFNSC3.1.

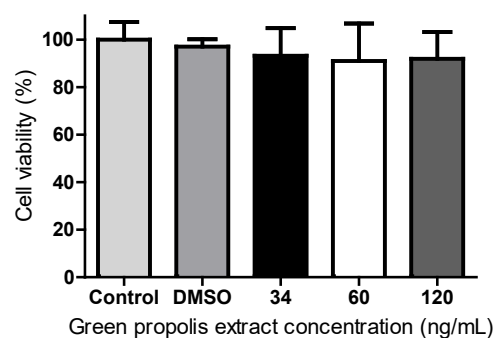

**Figure S2.** Percentage of viable cells (AMJ-2) after treatments with different concentrations of green propolis extract (ANOVA with Tukey's post hoc test,  $p > 0.05$ ).

**Table S1.** Substances in raw and purified beeswax. Analyses were carried out by GC/MS and annotation was based on the similarity of theoretical spectra found in the NIST11, NIST11-S, WILEY7, NIST08 and FFNSC3.1 databases.

| N° | Components *                                                     | Samples     |                  |       |          |    |                                     | Fraction (Extraction) |                   |                   |        |                        |
|----|------------------------------------------------------------------|-------------|------------------|-------|----------|----|-------------------------------------|-----------------------|-------------------|-------------------|--------|------------------------|
|    |                                                                  | Raw Beeswax | Purified Beeswax | RT    | Database | SI | Metabolic Class                     | Methanol:Water        | Dichloromethane M | Dichloromethane H | Hexane | Dichloromethane:Hexane |
|    |                                                                  |             |                  | (min) |          |    |                                     |                       |                   |                   |        |                        |
| 1  | (Z) 3-Phenyl-2-propenoic acid ou Cinnamic acid (1TMS) *          | x           | -                | 15.16 | NIST11s  | 95 | Phenylpropanoids                    | x                     |                   |                   |        |                        |
| 2  | 1,3-Dipalmitin (1TMS)                                            | -           | x                | 43.72 | NIST11s  | 69 | Glycerolipid                        |                       |                   |                   | x      |                        |
| 3  | 1,9- Nonanedioic acid ou Azelaic acid (2TMS)                     | x           | x                | 18.01 | NIST11s  | 92 | Fatty acid                          | x                     |                   |                   |        |                        |
| 4  | 2-Ethylbutyric acid, nonadecyl ester                             | -           | x                | 41.31 | NIST08   | 79 | Fatty acid                          |                       |                   |                   | x      |                        |
| 5  | 4-Hydroxy-3,5,5-trimethyl-4-[3-oxo-1-butenyl]-2-cyclohexen-1-one | x           | -                | 18.10 | NIST11s  | 93 | Ketone                              | x                     |                   |                   |        |                        |
| 6  | 4-Hydroxy-3-methoxy benzoic acid ou Vanillic acid (2TMS)         | x           | x                | 17.57 | WILEY7   | 85 | Benzene and substituted derivatives | x                     |                   |                   |        |                        |
| 7  | 4-Hydroxy-3-methoxy cinnamic acid ou Ferulic acid (1TMS) *       | x           | -                | 21.62 | NIST08   | 83 | Phenylpropanoids                    | x                     |                   |                   |        |                        |
| 8  | 4-methoxy-benzeneacetic acid (1TMS)                              | x           | -                | 15.04 | NIST11   | 86 | Benzene and substituted derivatives | x                     |                   |                   |        |                        |
| 9  | 4-Methoxy-benzoic acid (1TMS)                                    | x           | x                | 14.81 | NIST11   | 92 | Benzene and substituted derivatives | x                     |                   |                   |        |                        |
| 10 | 9,12-Octadecadienoic acid (Z,Z) (1TMS)                           | x           | -                | 23.60 | WILEY7   | 96 | Fatty acid                          | x                     | x                 | x                 |        |                        |

|    |                                                            |   |   |       |          |    |                                 |   |   |   |   |   |   |   |
|----|------------------------------------------------------------|---|---|-------|----------|----|---------------------------------|---|---|---|---|---|---|---|
| 11 | 9,12-Octadecadienoic acid, ethyl ester                     | x | - | 13.71 | WILEY7   | 82 | Fatty acid                      |   |   |   |   |   |   | x |
| 12 | 9-Octadecadienoic acid, ethyl ester                        | x | - | 22.91 | NIST11   | 94 | Fatty acid                      | x |   |   |   |   |   |   |
| 13 | 9-Octadecenoic acid (1TMS)                                 | x | - | 14.05 | WILEY7   | 96 | Fatty acid                      |   |   |   |   |   |   | x |
| 14 | 9-Octadecenoic acid, ethyl ester                           | x | - | 22.92 | NIST11   | 95 | Fatty acid                      |   |   |   |   | x |   | x |
| 15 | beta.-L-Mannofuranose, 6-deoxy-1,2,3,5-tetrakis-O-(1TMS)-? | x | - | 18.21 | WILEY7   | 88 | Sugar                           | x |   |   |   |   |   |   |
| 16 | Butanedioic acid (2TMS)                                    | - | x | 11.81 | WILEY7   | 95 | Carboxylic acid and derivatives | x |   |   |   |   |   |   |
| 17 | D-(-)-Tagatofuranose, pentakis, (1TMS) ether (isomer 1)?   | x | - | 17.88 | NIST11   | 91 | Sugar                           | x |   |   |   |   |   |   |
| 18 | D-(+)-Talofuranose, pentakis, (1TMS) ether (isomer 1)?     | x | - | 18.17 | NIST11   | 87 | Sugar                           | x |   |   |   |   |   |   |
| 19 | Decanedioic acid ou Sebacic acid (2TMS)                    | - | x | 18.96 | NIST08   | 92 | Fatty acid                      | x |   |   |   |   |   |   |
| 20 | Docosane                                                   | - | x | 23.45 | FFNSC1.3 | 97 | Hydrocarbon                     | x | x | x | x | x | x |   |
| 21 | Docosanoic acid (1TMS)                                     | x | - | 30.71 | NIST11s  | 95 | Fatty acid                      | x | x | x |   |   |   | x |
| 22 | Dodecanoic acid (1TMS)                                     | x | - | 16.28 | WILEY7   | 94 | Fatty acid                      | x |   |   |   |   |   |   |
| 23 | Dotriacontanoic acid (1TMS)                                | x | - | 50.36 | NIST08   | 86 | Fatty acid                      |   | x | x | x | x | x |   |
| 24 | Dotriacontanol (1TMS)                                      | x | - | 47.50 | NIST11   | 95 | Fatty acid                      |   | x | x | x | x | x |   |
| 25 | D-Psicofuranose, pentakis, (1TMS) ether (isomer 2)?        | x | - | 17.80 | NIST11   | 91 | Sugar                           | x |   |   |   |   |   |   |
| 26 | Eicosane                                                   | x | x | 20.38 | FFNSC1.3 | 97 | Hydrocarbon                     | x | x | x | x | x | x |   |
| 27 | Glucopyranose, pentakis-O (1TMS)?                          | x | - | 19.24 | NIST11   | 94 | Sugar                           | x |   |   |   |   |   |   |
| 28 | Glyceric acid (3TMS)                                       | x | - | 11.94 | NIST11s  | 90 | Sugar                           | x |   |   |   |   |   |   |
| 29 | Hecacosyl hexadecanoate                                    | x | - | 54.00 | NIST11   | 88 | Fatty acid                      |   |   |   |   |   |   | x |
| 30 | Hentriacontane                                             | x | x | 38.61 | FFNSC1.3 | 97 | Hydrocarbon                     |   | x |   |   |   |   |   |
| 31 | Heptacosane                                                | x | x | 31.70 | FFNSC1.3 | 97 | Hydrocarbon                     |   | x |   |   |   |   |   |
| 32 | Heptadecanoic acid (1TMS)                                  | - | x | 22.39 | NIST11s  | 92 | Fatty acid                      |   | x |   |   |   |   |   |
| 33 | Heptanoic acid, docosyl ester                              | - | x | 87.15 | WILEY7   | 69 | Fatty acid                      |   |   |   |   |   | x |   |
| 34 | Heptatriacontane                                           | - | x | 52.80 | NIST08   | 96 | Fatty acid                      |   | x | x |   |   |   | x |
| 35 | Hexacosane                                                 | x | x | 30.20 | NIST11   | 97 | Hydrocarbon                     |   |   |   |   |   | x |   |
| 36 | Hexacosanoic acid (1TMS)                                   | x | x | 37.48 | NIST08   | 96 | Fatty acid                      |   | x | x | x | x | x |   |
| 37 | Hexacosanol (1TMS) ether                                   | x | - | 35.71 | NIST11   | 84 | Fatty acid                      |   | x |   |   |   |   |   |
| 38 | Hexadecanoic acid (1TMS)                                   | x | x | 20.66 | WILEY7   | 96 | Fatty acid                      | x |   |   |   |   |   |   |
| 39 | Hexadecanoic acid, eicosyl ester                           | - | x | 92.17 | NIST08   | 79 | Fatty acid                      |   |   |   |   |   | x |   |
| 40 | Hexadecanoic acid, ethyl ester                             | x | - | 20.29 | WILEY7   | 96 | Fatty acid                      |   | x | x |   |   |   |   |
| 41 | Hexadecanoic acid, ethyl ester, ethyl palmitate            | x | - | 20.28 | WILEY7   | 95 | Fatty acid                      | x |   |   |   |   |   |   |
| 42 | Hexadecanoic acid, octacosyl ester                         | x | - | 85.48 | WILEY7   | 89 | Fatty acid                      |   |   |   |   |   | x |   |
| 43 | Hexadecanoic acid, propyl ester (2TMS)                     | x | x | 29.80 | NIST11s  | 93 | Fatty acid                      | x |   |   |   |   |   |   |
| 44 | Hexadecenoic acid (1TMS)                                   | x | x | 20.67 | NIST11   | 92 | Fatty acid                      | x | x |   |   |   |   |   |

|    |                                                       |   |   |       |          |    |                                           |   |   |   |   |   |
|----|-------------------------------------------------------|---|---|-------|----------|----|-------------------------------------------|---|---|---|---|---|
| 45 | Hexatriacontane                                       | - | x | 49.50 | NIST08   | 97 | Hydrocarbon                               | x | x | x | x | x |
| 46 | Hexatriacontanoic acid (1TMS)                         | x | - | 68.59 | NIST08   | 78 | Hydrocarbon                               |   | x |   |   |   |
| 47 | Hydrocinnamic acid ou<br>benzenepropanoic acid (1TMS) | x | x | 13.44 | NIST11   | 93 | Phenylpropanoids                          | x |   |   |   |   |
| 48 | Hydroxycinnamic acid ou p-<br>Coumaric acid (1TMS) *  | x | - | 19.66 | WILEY7   | 87 | Phenylpropanoids                          | x |   |   |   |   |
| 49 | Monopalmitin (1TMS) ether                             | - | x | 32.75 | NIST11s  | 93 | Glycerolipid                              | x |   |   |   |   |
| 50 | Nonacosane ou n-Nonacosane                            | x | x | 35.35 | FFNSC1.3 | 97 | Hydrocarbon                               | x | x | x |   | x |
| 51 | Nonadecane ou n-Nonadecane                            | x | - | 19.17 | WILEY7   | 97 | Hydrocarbon                               |   | x | x | x | x |
| 52 | Nonatriacontane                                       | - | x | 61.40 | WILEY7   | 97 | Hydrocarbon                               |   | x |   |   | x |
| 53 | Octacosane                                            | x | x | 33.27 | FFNSC1.3 | 97 | Fatty acid                                |   | x |   |   |   |
| 54 | Octacosanoic acid (1TMS)                              | x | x | 40.80 | NIST08   | 89 | Fatty acid                                | x | x |   |   | x |
| 55 | Octacosanol (1TMS)                                    | x | - | 39.19 | NIST11s  | 97 | Fatty acid                                |   | x |   | x | x |
| 56 | Octadecanoic acid ou stearic acid<br>(1TMS)           | x | x | 24.12 | NIST11s  | 95 | Fatty acid                                | x | x | x |   | x |
| 57 | Octadecenoic acid (1TMS)                              | x | x | 23.69 | WILEY7   | 96 | Fatty acid                                | x | x |   |   | x |
| 58 | Octadecenoic acid, ethyl ester                        | x | - | 22.90 | NIST11   | 94 | Fatty acid                                | x |   |   |   |   |
| 59 | Octatriacontane                                       | - | x | 56.70 | NIST08   | 96 | Fatty acid                                |   | x | x |   | x |
| 60 | Pentacosane                                           | x | x | 28.61 | FFNSC1.3 | 97 | Hydrocarbon                               | x | x | x |   | x |
| 61 | Pentatriacontane                                      | - | x | 46.66 | NIST11s  | 92 | Hydrocarbon                               | x | x | x |   | x |
| 62 | p-Hydroxybenzoic acid (1TMS)                          | x | x | 16.02 | NIST11s  | 90 | Benzene and<br>substituted<br>derivatives | x |   |   |   |   |
| 63 | Ricinoleic acid (1TMS)                                | x | x | 26.87 | WILEY7   | 93 | Fatty acid                                | x | x | x |   | x |
| 64 | Tetracontane                                          | - | x | 67.00 | FFNSC1.3 | 83 | Hydrocarbon                               |   | x |   |   | x |
| 65 | Tetracontanoic acid (1TMS)                            | x | - | 40.94 | NIST08   | 85 | Fatty acid                                |   |   |   | x |   |
| 66 | Tetracosan-1-ol (1TMS) ether                          | x | - | 32.31 | NIST08   | 81 | Fatty acid                                |   | x | x |   |   |
| 67 | Tetracosane                                           | x | x | 26.95 | WILEY7   | 97 | Hydrocarbon                               | x | x | x |   | x |
| 68 | Tetracosanoic acid (1TMS)                             | x | x | 33.80 | NIST11   | 95 | Fatty acid                                | x | x | x |   | x |
| 69 | Tetracosanoic acid, ethyl ester                       | x | - | 33.18 | FFNSC1.3 | 93 | Fatty acid                                |   | x |   |   |   |
| 70 | Tetracosanol (1TMS) ether                             | x | - | 32.32 | NIST08   | 81 | Hydrocarbon                               |   | x |   |   |   |
| 71 | Tetradecanoato, ethyl                                 | x | - | 33.17 | FFNSC1.3 | 94 | Hydrocarbon                               |   |   | x |   |   |
| 72 | Tetradecanoic acid ou myristic acid<br>(1TMS)         | x | x | 18.50 | WILEY7   | 96 | Fatty acid                                | x | x | x |   | x |
| 73 | Tetratriacontane                                      | - | x | 44.25 | NIST11   | 97 | Hydrocarbon                               | x | x | x |   | x |
| 74 | Triacotane                                            | x | x | 36.95 | FFNSC1.3 | 97 | Hydrocarbon                               | x |   | x |   | x |
| 75 | Triacotanoic acid (1TMS)                              | x | - | 44.91 | WILEY7   | 86 | Fatty acid                                | x | x | x |   | x |
| 76 | Triacotanol (1TMS) ether                              | x | - | 42.82 | NIST11   | 89 | Fatty acid                                |   | x | x |   | x |
| 77 | Tricosane ou n-Tricosane                              | x | x | 25.21 | WILEY7   | 97 | Hydrocarbon                               | x | x | x |   | x |
| 78 | Tritriacontadiene                                     | x | - | 41.39 | NIST11   | 94 | Hydrocarbon                               |   |   | x |   |   |

\* Shadow compounds are aromatic substances found in green propolis. TMS: Substances identified in the databases as silylated derivatives. RT: Average retention time considering all values found in the different fractions. SI: Similarity index. NOTE<sup>1</sup>: The classification of annotated substances was carried out according to the Classyfire database. NOTE<sup>2</sup>: The nomenclature provided by the database records was maintained in the breakdown of compounds.

**Table S2.** Apparent viscosity (30 s) and area of hysteresis of the creams as a function of storage time at room temperature.

| Time (day) | CBlank           |                    | CPropolis        |                    |
|------------|------------------|--------------------|------------------|--------------------|
|            | Viscosity (Pa.s) | Area of hysteresis | Viscosity (Pa.s) | Area of hysteresis |
| 0          | 2.9 ± 0.2 *      | 14,959 ± 1171 *    | 1.7 ± 0.5        | 11,783 ± 309       |
| 15         | 3.0 ± 0.1        | 15,653 ± 909       | 2.9 ± 0.2        | 14,296 ± 3319      |
| 30         | 3.2 ± 0.5        | 12,166 ± 452       | 3.2 ± 0.1        | 11,689 ± 1586      |
| 45         | 3.7 ± 1.1        | 11,220 ± 1214      | 2.3 ± 0.3        | 13,595 ± 2301      |
| 60         | 3.7 ± 0.2        | 12,400 ± 2586      | 3.5 ± 0.7 **     | 14,379 ± 3152      |

Values expressed as mean ± SD. *t*-test for the same times of different samples and ANOVA, with Tukey's post hoc test for all times of the same sample ( $p < 0.01$ ) ( $n = 3$ ). \* Statistical difference between the T0 of the two samples. \*\* Statistical difference of the same sample in relation to the T0.

**Table S3.** Confounding variables taken into account in the distribution of groups.

| Population                                                   | Control Group ( $n = 8$ ) | Frequency (%) | Intervention Group ( $n = 8$ ) | Frequency (%) | <i>p</i> -value |
|--------------------------------------------------------------|---------------------------|---------------|--------------------------------|---------------|-----------------|
| MTX dose increase                                            | 1                         | 12.5          | 0                              | 0             | 0.608 *         |
| Introduction of oral corticosteroids                         | 0                         | 0             | 1                              | 12.5          |                 |
| Introduction of oral antibiotics and topical corticosteroids | 1                         | 12.5          | 0                              | 0             |                 |
| MTX withdrawal                                               | 0                         | 0             | 1                              | 12.5          |                 |
| Cyclosporine dose decrease                                   | 0                         | 0             | 1                              | 12.5          |                 |
| Oral corticosteroids withdrawal                              | 0                         | 0             | 1                              | 12.5          |                 |

MTX= methotrexate. \* Probability of significance (*p*-value) calculated by Fisher's exact test.

**Table S4.** Allergic comorbidities presented by patients included in the study.

| Comorbidities     | Control Group ( $n = 8$ ) | Frequency (%) | Intervention Group ( $n = 8$ ) | Frequency (%) |
|-------------------|---------------------------|---------------|--------------------------------|---------------|
| Rhinit            | 3                         | 37.5          | 3                              | 37.5          |
| Asthma            | 2                         | 25            | 0                              | 0             |
| Asthma and Rhinit | 0                         | 0             | 3                              | 37.5          |

Figure S3. Sociodemographic and clinical data.



ATOPIC DERMATITIS RESEARCH – FCFRP/USP

**SOCIODEMOGRAPHIC AND CLINICAL DATA**



Name: \_\_\_\_\_ Telephone: \_\_\_\_\_

Registration N°: \_\_\_\_\_ Address: \_\_\_\_\_

Date of 1<sup>st</sup> interview: \_\_\_\_/\_\_\_\_/\_\_\_\_ Date of 2<sup>nd</sup> interview: \_\_\_\_/\_\_\_\_/\_\_\_\_ Date of 3<sup>rd</sup> interview: \_\_\_\_/\_\_\_\_/\_\_\_\_

**SOCIODEMOGRAPHIC DATA**

1. Gender: ☐ M ☐ F 2. Pregnant or Lactating? ☐ No ☐ Yes 3. Age: \_\_\_\_\_

4. Birth: \_\_\_\_/\_\_\_\_/\_\_\_\_ 5. Marital Status: ☐ Single ☐ Married ☐ Widower ☐ Divorced

Others: \_\_\_\_\_

6. Education Level: ☐ Illiterate ☐ Elementary school ☐ Incomplete elementary school ☐ Middle school

☐ Higher education ☐ Postgraduate

7. Profession: \_\_\_\_\_

8. Professional situation: ☐ Employed ☐ Unemployed ☐ Student ☐ Retiree

9. Companion: ☐ No ☐ Yes

Who? \_\_\_\_\_ Telephone: \_\_\_\_\_

**CLINICAL DATA**

10. First medical diagnosis of atopic dermatitis: \_\_\_\_\_

11. Number of dermatologist appointments per year: \_\_\_\_\_

12. Do you have contact dermatitis? ☐ No ☐ Yes To which material? \_\_\_\_\_

12.1 Avoid contact? ☐ No ☐ Yes To which material? \_\_\_\_\_

13. Perform environmental prophylaxis? ☐ No ☐ Yes

14. Do you have dogs? ☐ No ☐ Yes

15. Do you have cats? ☐ No ☐ Yes

16. Do you use sofa cover? ☐ No ☐ Yes 17. Do you have rugs at home? ☐ No ☐ Yes

18. Are you allergic to any drug? ☐ No ☐ Yes Which one? \_\_\_\_\_

19. Are you allergic to propolis (substance present in bee honey)? ☐ No ☐ Yes ☐ I do not know

20. Are you allergic to cocoa butter and/or cocoa? ☐ No ☐ Yes ☐ I do not know

# ATOPIC DERMATITIS RESEARCH – FCFRP/USP

21. The use of cosmetic was recommended by the doctor?(moisturizing cream): ☐ No ☐ Yes Which? \_\_\_\_\_

22. Do you use cosmetics as a complement to the treatment of atopic dermatitis? ☐ No ☐ Yes Which? \_\_\_\_\_

23. What is the bath time? \_\_\_\_\_ 23.1 Do you use bath sponge? ☐ No ☐ Yes

23.2 Do you use warm water? ☐ No ☐ Yes

24. Have you ever had any previous surgery? ☐ No ☐ I do not know ☐ Yes, Which? \_\_\_\_\_

☐ Tonsillectomy ☐ Adenectomy Others: \_\_\_\_\_

25. Do you have allergic diseases? ☐ No ☐ I do not know ☐ Yes, Which? \_\_\_\_\_

☐ Allergic Rhinitis ☐ Asthma ☐ Allergic conjunctivitis Others: \_\_\_\_\_

26. Do you have other diagnosed diseases? ☐ No ☐ Yes, Which? \_\_\_\_\_

☐ Liver Diseases ☐ Depression ☐ Neurological Diseases

☐ Anxiety ☐ Kidney Diseases ☐ Cardiovascular Diseases

☐ Metabolic Diseases ☐ Osteo-articular Diseases Others: \_\_\_\_\_

27. Is there another family member with atopic dermatitis? ☐ No ☐ Yes Who? \_\_\_\_\_

28. What is the period of the year/weather ☐ Summer ☐ Winter ☐ Rain ☐ Indifferent Others \_\_\_\_\_ when the atopic dermatitis gets worse?

29. How do you consider your illness? ☐ Mild ☐ Moderate ☐ Severe

30. Do you understand how to use the cream? ☐ Yes ☐ No

## DRUG THERAPY

| Drug (Oral)    | How many times/days and what time | Continuous use (yes or no) | Treatment time |
|----------------|-----------------------------------|----------------------------|----------------|
|                |                                   |                            |                |
|                |                                   |                            |                |
|                |                                   |                            |                |
|                |                                   |                            |                |
|                |                                   |                            |                |
| Drug (Topical) | How many times/days and what time | Continuous use (yes or no) | Treatment time |
|                |                                   |                            |                |
|                |                                   |                            |                |
|                |                                   |                            |                |
|                |                                   |                            |                |
|                |                                   |                            |                |



# ATOPIC DERMATITIS RESEARCH – FCFRP/USP

|                   |                                   |                            |                |
|-------------------|-----------------------------------|----------------------------|----------------|
| Drug (Injectable) | How many times/days and what time | Continuous use (yes or no) | Treatment time |
| Drug (Sublingual) | How many times/days and what time | Continuous use (yes or no) | Treatment time |
| Drug (Nasal)      | How many times/days and what time | Continuous use (yes or no) | Treatment time |
|                   |                                   |                            |                |

## INJURIES REGIONS

31. Presence of injuries 0 month:                      Presence of injuries 2 month:

## HEALTH BEHAVIORS

32. Do you consume alcoholic drink? ☐ No ☐ Yes Quantity per day: \_\_\_\_\_

33. Do you smoke? ☐ No ☐ Ex Smoker ☐ Yes Quantity per day: \_\_\_\_\_

34. Do you exercise? ☐ No ☐ Yes Frequency: \_\_\_\_\_

## DATA ON FORMULATION ADHESION – AFTER 1 MONTH OF TREATMENT

35. Have you ever stopped using the cream? ☐ No ☐ Yes How many days: \_\_\_\_\_ Why? \_\_\_\_\_

36. Do the cream cause any discomfort? ☐ No ☐ Yes Which: \_\_\_\_\_

37. Regarding the cream, what are the complaints below:

☐ Inefficient treatment      ☐ Treatment interferes with daily activities      ☐ Fear of side effects

☐ Instructions are unclear      ☐ Cream has unpleasant smell      ☐ Cream caused itching

☐ Cream leaves stains on clothes or surface

☐ Cream changed appearance      ☐ Cream left the skin dry

☐ Cream caused burning      ☐ Cream makes the skin oily

☐ Cream is difficult to spread      ☐ Cream is hard to get out of the bottle

Others: \_\_\_\_\_

ATOPIC DERMATITIS RESEARCH – FCFRP/USP

DATA ON FORMULATION ADHESION – AFTER 2 MONTH OF TREATMENT

38. Have you ever stopped using the cream? ☐ No ☐ Yes How many days: \_\_\_\_\_ Why? \_\_\_\_\_
39. Do the cream cause any discomfort? ☐ No ☐ Yes Which: \_\_\_\_\_
40. Did you use any other moisturizer during the study period? ☐ No ☐ Yes Why? \_\_\_\_\_
41. Is there any cream left in the bottle? ☐ No ☐ Yes 41.1 How many bottles? \_\_\_\_\_
42. Regarding the cream, what are the complaints below:
- ☐ Inefficient treatment ☐ Treatment interferes with daily activities ☐ Fear of side effects
- ☐ Instructions are unclear ☐ Cream has unpleasant smell ☐ Cream caused itching
- ☐ Cream leaves stains on clothes or surface
- ☐ Cream changed appearance ☐ Cream left the skin dry
- ☐ Cream caused burning ☐ Cream makes the skin oily
- ☐ Cream is difficult to spread ☐ Cream is hard to get out of the bottle
- Others: \_\_\_\_\_

LABORATORY EXAMS

43. IgE Values: \_\_\_\_\_
44. Prick test: ☐ Accomplished ☐ Unaccomplished
- To which elements? \_\_\_\_\_
45. Patch test: ☐ Accomplished ☐ Unaccomplished
- To which elements and number of crosses? \_\_\_\_\_
